# Correlation of Circulating MMP-9 with White Blood Cell Count in Humans: Effect of Smoking

Soren Snitker<sup>1,9</sup>, Keming Xie<sup>1,2,9</sup>, Kathleen A. Ryan<sup>1</sup>, Daozhan Yu<sup>1</sup>, Alan R. Shuldiner<sup>1,3</sup>, Braxton D. Mitchell<sup>1</sup>, Da-Wei Gong<sup>1,3\*</sup>

**1** Division of Endocrinology, Diabetes and Nutrition, Department of Medicine, University of Maryland School of Medicine, Baltimore, Maryland, United States of America, **2** Department of Pathophysiology, Medical College of Soochow University, Suzhou, China, **3** Geriatrics Research and Education Clinical Center, Baltimore Veterans Affairs Medical Center, Baltimore, Maryland, United States of America

## Abstract

**Background:** Matrix metalloproteinase-9 (MMP-9) is an emerging biomarker for several disease conditions, where white blood cell (WBC) count is also elevated. In this study, we examined the relationship between MMP-9 and WBC levels in apparently healthy smoking and non-smoking human subjects.

**Methods:** We conducted a cross-sectional study to assess the relationship of serum MMP-9 with WBC in 383 men and 356 women. Next, we divided the male population (women do not smoke in this population) into three groups: never (n = 243), current (n = 76) and former (n = 64) smokers and compared the group differences in MMP-9 and WBC levels and their correlations within each group.

**Results:** Circulating MMP-9 and WBC count are significantly correlated in men ( $R^2 = 0.13$ ,  $p < 0.001$ ) and women ( $R^2 = 0.19$ ,  $p < 0.001$ ). After stratification by smoking status, MMP-9 level was significantly higher in current smokers (mean  $\pm$  SE;  $663.3 \pm 43.4$  ng/ml), compared to never ( $529.7 \pm 20.6$ ) and former smokers ( $568 \pm 39.3$ ). WBC count was changed in a similar pattern. Meanwhile, the relationship became stronger in current smokers with increased correlation coefficient of  $r = 0.45$  or  $R^2 = 0.21$  ( $p < 0.001$ ) and steeper slope of  $\beta = 1.16 \pm 0.30$  ( $p < 0.001$ ) in current smokers, compared to  $r = 0.26$  or  $R^2 = 0.07$  ( $p < 0.001$ ) and  $\beta = 0.34 \pm 0.10$  ( $p < 0.001$ ) in never smokers.

**Conclusions:** WBC count accounts for 13% and 19% of MMP-9 variance in men and women, respectively. In non-smoking men, WBC count accounts for 7% of MMP-9 variance, but in smoking subjects, it accounts for up to 21% of MMP-9 variance. Thus, we have discovered a previously unrecognized correlation between the circulating MMP-9 and WBC levels in humans.

**Citation:** Snitker S, Xie K, Ryan KA, Yu D, Shuldiner AR, et al. (2013) Correlation of Circulating MMP-9 with White Blood Cell Count in Humans: Effect of Smoking. PLoS ONE 8(6): e66277. doi:10.1371/journal.pone.0066277

**Editor:** Giuseppe Biondi-Zoccai, Sapienza University of Rome, Italy

**Received:** February 11, 2013; **Accepted:** May 3, 2013; **Published:** June 25, 2013

**Copyright:** © 2013 Snitker et al. This is an open-access article distributed under the terms of the Creative Commons Attribution License, which permits unrestricted use, distribution, and reproduction in any medium, provided the original author and source are credited.

**Funding:** The study was partially supported by grants from Maryland Clinical Nutrition Research Unit (DK072488), the Baltimore Diabetes Research and Training Center, U01 HL072512, and U01GM074518 from the National Institutes of Health. The funders had no role in study design, data collection and analysis, decision to publish, or preparation of the manuscript.

**Competing Interests:** The authors have declared that no competing interests exist.

\* E-mail: dgong@medicine.umaryland.edu

## Introduction

Matrix metalloproteinases (MMPs) are a family of endopeptidases that degrade extracellular matrix proteins (ECMs), play a pivotal role in tissue remodeling, and participate in a variety of physiological and pathological processes [1],[2],[3],[4]. One of the members of the MMP family, MMP-9, is a gelatinase that has been implicated in the pathogenesis of atherosclerosis [5] and chronic obstructive pulmonary disease (COPD) [6,7] in addition to tumor formation and metastasis [8],[9]. Accordingly, a number of studies have associated elevated serum levels of MMP-9 with many chronic inflammatory conditions including coronary artery disease (CAD) [10],[11],[12],[13],[14],[15],[16], COPD [17],[18],[19], arthritis [20],[21],[22] and metabolic syndrome [23],[24]. Thus, MMP-9 has emerged as a novel disease marker [25,26,27] as well as a therapeutic target [28],[29]. However, to make MMP-9 a clinically meaningful risk marker, the source of elevated MMP-9 levels in a variety of states must be better understood.

MMP-9 is broadly expressed in many tissues and types of cells, including lungs [30,31], heart [32],[33], brain [34], neutrophils [35],[36], smooth muscle cells, endothelium [37] and cancer cell lines [38]. While the source(s) of circulating MMP-9 levels has not been unequivocally established, both *in vitro* and *in vivo* studies indicate that neutrophils can be such a source. *In vitro*, leukocyte MMP-9 gene expression and protein release are stimulated by inflammatory mediators such as phorbol 12-myristate 13-acetate (PMA), tumor necrosis factor- $\alpha$  (TNF $\alpha$ ) and bacterial lipopolysaccharides (LPS) [39],[40],[41],[42]. In healthy human subjects given LPS intravenously, plasma MMP-9 levels rise rapidly in a pattern that matches its release of isolated neutrophils *in vitro* in the same subjects, suggesting that neutrophils are a likely source of MMP-9 in an overt and acute inflammatory condition [43]. In an attempt to determine the source of circulating MMP-9 in a non-infectious, inflammatory state, Jonsson et al. [44] fractionated blood cells from patients with CAD and from healthy controls into peripheral blood mononuclear cells (PBMCs) and neutrophils, and

found that the dominant source of MMP-9 is neutrophils and that neutrophils from CAD patients secreted more MMP-9 than those from the controls *in vitro*. However, no statistical difference in circulating MMP-9 levels was detected between the CAD patients and controls.

Intriguingly, in subclinical inflammatory conditions where MMP-9 is elevated, such as CAD, COPD and metabolic syndrome, white blood cell count (WBC) is frequently elevated [23,24,45,46,47,48], although MMP-9 and WBC are usually studied separately. The joint association of these factors with inflammatory diseases, along with the *in vitro* mechanistic studies [39],[40],[41],[42],[44], raises the possibility that leukocytes could be a major source of the circulating MMP-9 in humans, especially in an inflammatory condition. Smoking is a common cause of non-infectious, subclinical inflammation. We thus hypothesized that (1) MMP-9 will be correlated with WBC at the population level, (2) MMP-9 levels will be higher in smokers than in never-smokers, and (3) MMP-9 levels for a given WBC level will be higher in current smokers than in never and former smokers. We tested these hypotheses in a well-defined, apparently healthy population.

## Methods

### Study subjects

Subjects included in this study were relatively healthy adults aged 20 years or older from the Amish population in Lancaster County, Pennsylvania, who participated in the Heredity and Phenotype Intervention (HAPI) Heart Study [49],[50]. The primary goal of this study was to identify genes that interact with environmental exposures to modify risk factors for cardiovascular disease. Study-wide exclusion criteria included: 1) age <20 years, 2) currently pregnant or postpartum <6 months, 3) blood pressure at the time of screening >180/105 mm Hg, and 4) coexisting malignancy.

All subjects provided their written informed consent to participate in the study and the Institutional Review Board of University of Maryland for Human Research approved the study.

### Examination of subjects and laboratory methods

All study participants underwent a physical examination during their visit to the Amish Research Clinic in Strasburg, PA. Subjects were withdrawn from all medications, vitamins and supplements for seven days prior to their initial assessment. Height and weight were measured using a stadiometer and calibrated scale with shoes removed and in light clothing, and body mass index (BMI) ( $\text{kg}/\text{m}^2$ ) was computed. Blood pressure was measured in triplicate in the sitting position after the subject had been sitting quietly for 5 min by use of a standard sphygmomanometer, and the average of the measurements was calculated. Participants reported their smoking habits, including whether they currently or ever smoked, the amount they smoked, and the years they started and, if applicable, quit smoking, from which the duration and lifetime dose of cigarette smoking could be calculated. Blood samples were drawn in the fasting state and placed at 4°C, processed within 30 to 60 minutes, and frozen at -80°C until laboratory assay. Total cholesterol, low and high density lipoprotein cholesterol (LDL-C and HDL-C), alanine aminotransferase (ALT), hemoglobin, red and white blood cell counts, and HCT were assayed by Quest Diagnostics (Lancaster, PA). Glucose was measured with a YSI glucose analyzer using the glucose oxidase method at the University of Maryland, General Clinical Research Center (Baltimore, MD). Insulin was measured by radioimmunoassay at Johns Hopkins Bayview Medical Center (Baltimore, MD). Serum concentrations of IL-1 $\beta$  were measured in triplicate and MMP-1

and MMP-9 concentrations in duplicate using an enzyme-linked immunosorbent assay (ELISA) (R&D Systems, Minneapolis, MN) by the University of Maryland Cytokine Biochemistry Core Laboratory. SAA was measured in duplicate by ELISA (Biosource, Camarillo, CA). The means of the replicate values were used for data analyses. The assay detection ranges were 0.781 to 50 pg/ml for IL-1 $\beta$ , 0.156 to 10 ng/ml for MMP-1, 31.2 to 2000 ng/ml for MMP-9, 5.0 to 600 ng/ml for SAA. Samples above the maximum detection values were diluted for measurement. The intra-assay coefficients of variation (CV) were 5.5%, 7.5%, 5.8% and 4.9% for IL-1 $\beta$ , MMP-1, MMP-9 and SAA, respectively. High-sensitive CRP, determined by End Point Nephelometry, was assayed by Quest Diagnostics with inter-assay CV of 4.8%.

### Statistical analysis

Data are reported as mean  $\pm$  standard error (SE) unless otherwise stated. Group differences and regression analyses were carried out in a variance component framework in which we incorporated relatedness among study participants as a random effect (polygenic component), as implemented in the SOLAR software program (version 4.07 Southwest Foundation for Biomedical Research, San Antonio, TX). We computed mean levels of WBC and multiple inflammatory markers (e.g. MMP-1, interleukin 1 $\beta$  (IL-1 $\beta$ ), MMP-9, CRP, and SAA) by quartile of MMP-9 to assess the correlations of these variables with MMP-9. We then tested the correlations between MMP-9 and each of these factors using a regression-based approach with adjustment for age and body mass index (BMI). MMP-9 was natural logarithm transformed prior to analysis, and the transformed values were approximately normally distributed. Similarly, we logarithm transformed other non-normally distributed variables (e.g., CRP and MMP-1) prior to analysis. For Figs. 1 and 2, we employed Pearson's correlation analysis to calculate correlations between variables and ANOVA for comparison of cytokine mean differences between smokers and non-smokers (GraphPad Software; La Jolla, CA). We consider a  $p$  value <0.05 statistically significant.

## Results

### Association of MMP-9 with WBC count in men and women

Basic clinical characteristics and cytokine levels of the study subjects are summarized and stratified by gender in Table 1. Compared with women, men had higher values of HDL, ALT, diastolic blood pressure (DBP), RBC count, MMP-9 and CRP levels, whereas they had lower values of BMI, platelet count and SAA. To explore the correlation between MMP-9 and WBC count, we first examined the association in the whole population regardless of smoking status. Since MMP-9 levels differed between men and women, we conducted analyses separately for men and women. We first compared select anthropometric and biochemical markers according to MMP-9 quartile and determined the  $P$  for trend. We adjusted for age and BMI, as these variables influence many laboratory measurements. Tables 2 and 3 show the results for men and women, respectively. In men, (Table 2), MMP-9 level is strongly associated with WBC count and less significantly with RBC count, MMP-1 and SAA levels, but not with IL-1 $\beta$  and CRP levels. In women (Table 3), MMP-9 level is associated with WBC, MMP-1, IL-1 $\beta$  and CRP, but not with RBC. The fact that MMP-9 levels are correlated with MMP1, CRP and RBC opens a possibility of co-regulation among these parameters. To exclude the possible confounding effect, the association of MMP-9 with

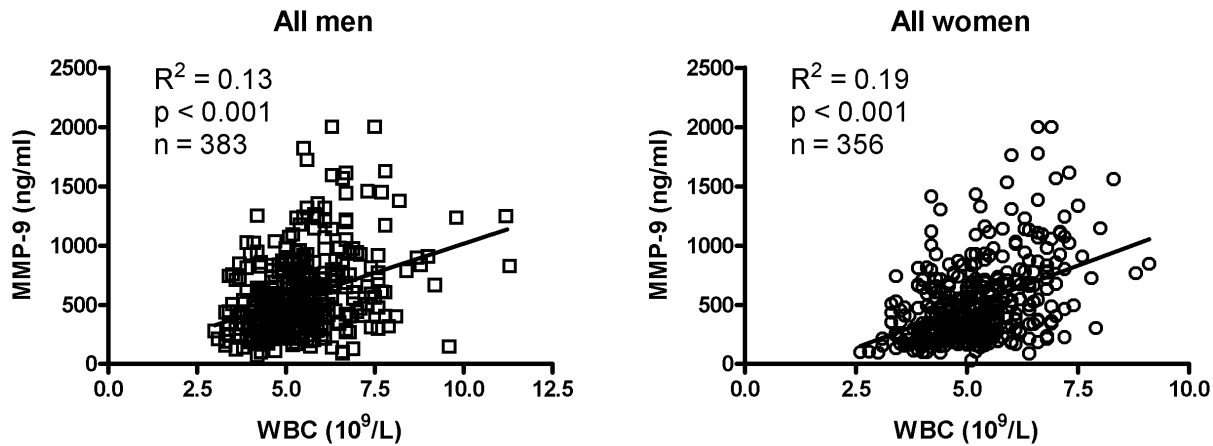

**Figure 1. Correlation between MMP-9 and WBC in apparently healthy subjects.** Linear regression analysis of the correlation between MMP-9 and WBC in men ( $n=383$ ) and women ( $n=356$ ). doi:10.1371/journal.pone.0066277.g001

WBC was further examined after adjustment for these factors individually and remained strong (Tables 2 and 3).

Next, we examined the association of WBC count by quartiles vs. the same set of parameters in men and women. Tables 4 and 5 show that WBC count is associated with MMP-9 and CRP levels in both sexes, but with RBC count only in men and MMP-1 only in women. After adjustment for the factors individually, WBC count still hold a strong association with MMP-9. Moreover, the association remains strong regardless of the adjustment for CRP in the above analyses. Thus, the association of MMP-9 with WBC is independent of RBC, MMP-1, CRP, and other biochemistry parameters (data not shown). Fig. 1 recapitulates the correlation of

MMP-9 with WBC in men ( $r=0.33$ ,  $p<0.001$ ) and women ( $r=0.42$ ,  $p<0.001$ ) in scatter plot.

#### Elevation of MMP-9 and WBC in current smokers

The comparison of MMP-9 levels between smokers and non-smokers was restricted to Amish men, since Amish women do not smoke. To examine whether cigarette smoking influences MMP-9 and WBC levels, we stratified men into three groups: never ( $n=243$ ), current ( $n=76$ ) and former ( $n=64$ ) smokers and compared the changes of MMP-9 and WBC, along with CRP and MMP-1, among the groups. Fig. 2 shows that MMP-9 was

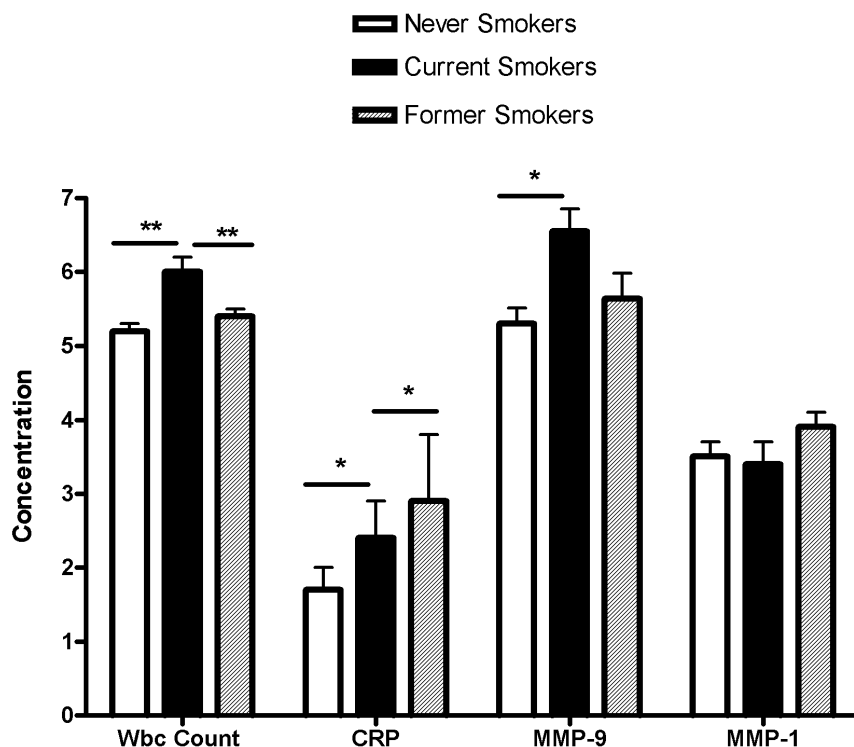

**Figure 2. Plasma concentrations of inflammatory markers according to smoking status.** White blood cell (WBC) count is expressed as ( $5 \times 10^9/L$ ), C-reactive protein (CRP), MMP-9 and MMP-1 as ng/ml. logCRP and logMMP-9 were used for analyses. \*:  $p<0.05$ ; \*\*:  $p<0.01$ . doi:10.1371/journal.pone.0066277.g002

**Table 1.** Basic Clinical Characteristics and Cytokine Levels of Study Participants by Gender.

|                                 | Women (n = 356)       | Men (n = 383)         | p-value**      |
|---------------------------------|-----------------------|-----------------------|----------------|
| AGE (years)                     | 45.0±0.7 (20–76)      | 41.5±0.7 (20–77)      | <b>0.0007</b>  |
| BMI (kg/m <sup>2</sup> )        | 27.7±0.3 (17.3–46.8)  | 25.5±0.2 (18.4–38.0)  | <b>4.4E-09</b> |
| Cholesterol (mg/dl)             | 217.1±2.7 (103–413)   | 204.7±2.2 (75–379)    | 0.06           |
| HDL                             | 59.6±0.8 (27–116)     | 53.1±0.7 (24–100)     | <b>4.6E-11</b> |
| LDL                             | 143.0±2.5 (28–330)    | 138.8±2.1 (17–290)    | 0.54           |
| Triglycerides* (mg/dl)          | 72.4±2.3 (9.9–255)    | 63.8±1.9 (11–298)     | 0.31           |
| Glucose*                        | 86.1±0.6 (48–173)     | 86.7±(49–209)         | 0.45           |
| Insulin*                        | 9.6±0.3 (0.5–45.4)    | 8.5±0.2 (0.4–25.2)    | 0.03           |
| ALT (U/L)*                      | 16.7±0.3 (6–44)       | 20.7±0.4 (8–71)       | <b>1.9E-21</b> |
| SBP (mm Hg)                     | 121.2±0.9 (83–183)    | 121.1±0.6 (93–163)    | 0.15           |
| DBP (mm Hg)                     | 75.8±0.4 (58–107)     | 77.8±0.5 (41–108)     | <b>2.3E-05</b> |
| WBC (10 <sup>3</sup> /μl)       | 5.2±0.1 (2.6–9.1)     | 5.4±0.1 (3.0–11.3)    | <b>0.05</b>    |
| RBC(10 <sup>12</sup> /L)*       | 4.26±0.02 (3.53–5.11) | 4.78±0.02 (3.82–5.80) | <b>1.0E-92</b> |
| Platelet (10 <sup>9</sup> /L) * | 242.2±2.8 (94–570)    | 228.9±2.6 (81–551)    | <b>0.004</b>   |
| MMP-1 (ng/ml)*                  | 3.9±0.1 (0.2–10.0)    | 3.6±0.1 (0.2–10.0)    | 0.18           |
| IL-1β (ng/ml)*                  | 4.6±0.6 (0.8–50.0)    | 4.1±0.5 (0.8–50.0)    | 0.89           |
| MMP-9 (ng/ml)*                  | 512.8±18.1 (31–2000)  | 562.7±17.1 (68–2000)  | <b>0.008</b>   |
| CRP (ng/ml)*                    | 1.9±0.1 (0.2–23.0)    | 2.1±0.3 (0.2–78.6)    | <b>0.05</b>    |
| SAA (μg/ml)*                    | 25.9±2.4 (2–298)      | 13.0±1.0 (0.4–107)    | <b>4.6E-11</b> |

Values are Mean ± SE (range).

\*: Log-transformed for analysis;

\*\*:. Except for age, all p values are adjusted for age; Bold for p<0.05.

doi:10.1371/journal.pone.0066277.t001

25.2% higher in current than never smokers (current vs. never; 663.3±43.4 vs. 529.7±20.6 ng/ml, p<0.01) and its level was reduced by 14% to 568.0±39.3 ng/ml in former smokers. Likewise, WBC count in current smokers was 17.7% higher than never smokers (6.1±0.2 vs. 5.2±0.1×10<sup>9</sup>/L, p<0.001). An 8% decrease of WBC was found in former smokers (5.5±0.2×10<sup>9</sup>/L),

but the level remained significantly higher than that of never smokers. For comparison, the CRP level was higher in current smokers by 41.7% (p<0.01 vs. never smokers) and further increased by 39.8% in former smokers but with no statistical significance vs. never and current smokers. In contrast, MMP-1 levels did not differ among the three groups.

### Enhanced Correlation between MMP-9 and WBC in current smokers

A similar regulation pattern of MMP-9 and WBC by smoking status suggests a possible co-regulation between the two variables (Fig. 2). We next performed linear regression analysis to assess whether the correlation of MMP-9 vs. WBC count varied by smoking status, in comparison with that of CRP vs. WBC count. As shown in Fig. 3, a weak correlation was observed between MMP-9 and WBC count in never smokers ( $R^2 = 0.07$  or  $r = 0.26$ ,  $p < 0.0001$ ;  $\beta = 0.34$ ,  $p < 0.001$ ), and the relationship became stronger in current smokers ( $R^2 = 0.21$  or  $r = 0.45$ ,  $p < 0.001$ ;  $\beta = 1.16$ ,  $p < 0.001$ ) and remained significant in former smokers ( $R^2 = 0.13$  or  $r = 0.34$ ,  $p < 0.01$ ;  $\beta = 0.89$ ,  $p < 0.001$ ). As a result, WBC account for 7% of MMP-9 variants in never smokers but for 21% in current smokers. Further  $\beta$  interaction analysis indicates that the slope of MMP-9 and WBC relationship is significantly steeper ( $p < 0.001$ ) in current and former smokers than never smokers. For comparison, although CRP is correlated with WBC count, its relationship does not vary appreciably with smoking status in terms of the correlation coefficient ( $R^2 = \sim 0.1$ ) and slope ( $\beta = 0.23 - 0.35$ ).

### Discussion

In this study, we examined the MMP-9 and WBC relationship in a relatively healthy population. We have found that circulating MMP-9 levels are positively correlated with WBC in men and women. Moreover, both markers are elevated and the relationship improves in respect of the correlation coefficient and  $\beta$  value in smoking subjects. The finding is significant in that it provides epidemiological evidence supporting that WBC count is a likely source of circulating MMP-9 *in vivo* and that cigarette smoking is a notable influencing factor for MMP-9 as well as WBC elevation. Previous studies have suggested that neutrophils can be responsible

**Table 2.** Association of MMP-9 Quartiles with Selected Clinical Characteristics in Men.

|                           | Quartile 1 | Quartile 2 | Quartile 3 | Quartile 4 | P for trend    | P for trend    |
|---------------------------|------------|------------|------------|------------|----------------|----------------|
|                           | MMP-9:     | MMP-9:     | MMP-9:     | MMP-9:     | P for trend    | Adjusted for   |
|                           | 68–316     | 319–477    | 485–726    | 727–2000   | Adjusted for   | age, BMI, &    |
|                           | (n = 95)   | (n = 96)   | (n = 96)   | (n = 96)   | age, BMI       | MMP-1          |
|                           |            |            |            |            |                | RBC            |
| AGE (years)               | 40.8±1.4   | 40.1±1.3   | 41.1±1.4   | 44.1±1.3   | NA             | NA             |
| BMI (kg/m <sup>2</sup> )  | 24.8±0.3   | 25.5±0.4   | 25.5±0.3   | 26.2±0.3   | NA             | NA             |
| SBP (mm Hg)               | 122±1      | 121±1      | 121±1      | 120±1      | 0.07           | 0.06           |
| DBP (mm Hg)               | 78±1       | 77±1       | 79±1       | 78±1       | 0.61           | 0.60           |
| WBC (10 <sup>9</sup> /L)  | 5.0±0.1    | 5.1±0.1    | 5.4±0.1    | 6.0±0.2    | <b>1.3E-09</b> | <b>2.9E-09</b> |
| RBC(10 <sup>12</sup> /L)* | 4.73±0.03  | 4.74±0.03  | 4.83±0.03  | 4.82±0.03  | <b>0.003</b>   | <b>0.003</b>   |
| MMP-1 (ng/ml)             | 3.2±0.2    | 3.6±0.2    | 3.5±0.2    | 4.0±0.3    | <b>0.02</b>    | NA             |
| IL-1β (ng/ml)             | 2.9±0.8    | 5.2±1.2    | 4.4±1.1    | 4.0±1.0    | 0.48           | 0.40           |
| CRP (ng/ml)               | 2.2±0.8    | 1.5±0.3    | 1.6±0.3    | 3.3±0.9    | 0.07           | 0.09           |
| SAA (μg/ml)               | 11.6±1.8   | 13.3±2.1   | 11.6±1.8   | 17.2±2.5   | <b>0.05</b>    | 0.07           |

doi:10.1371/journal.pone.0066277.t002

**Table 3.** Association of MMP-9 Quartiles with Selected Clinical Characteristics in Women.

|                            | Quartile 1 | Quartile 2 | Quartile 3 | Quartile 4 |                | P for trend    | P for trend    |
|----------------------------|------------|------------|------------|------------|----------------|----------------|----------------|
|                            | MMP-9:     | MMP-9:     | MMP-9:     | MMP-9:     | P for trend    | Adjusted for   | Adjusted for   |
|                            | 31–263     | 263–413    | 413–677    | 683–2000   | Adjusted for   | age, BMI, &    | age, BMI, &    |
|                            | (n = 89)   | (n = 89)   | (n = 89)   | (n = 89)   | age, BMI       | CRP            | MMP-1          |
| AGE (years)                | 47.5±1.6   | 46.2±1.4   | 43.5±1.4   | 43.0±1.4   | NA             | NA             | NA             |
| BMI (kg/m <sup>2</sup> )   | 27.1±0.6   | 28.4±0.6   | 27.2±0.5   | 28.2±0.5   | NA             | NA             | NA             |
| SBP (mm Hg)                | 124±2      | 121±2      | 118±2      | 122±2      | 0.47           | 0.53           | 0.32           |
| DBP (mm Hg)                | 77±1       | 75±1       | 76±1       | 75±1       | 0.16           | 0.23           | 0.20           |
| WBC (10 <sup>9</sup> /L)   | 4.7±0.1    | 5.0±0.1    | 5.2±0.1    | 5.9±0.1    | <b>1.6E-14</b> | <b>4.3E-12</b> | <b>1.6E-12</b> |
| RBC (10 <sup>12</sup> /L)* | 4.26±0.03  | 4.26±0.03  | 4.24±0.03  | 4.27±0.03  | 0.34           | 0.37           | 0.60           |
| MMP-1 (ng/ml)              | 3.6±0.3    | 3.6±0.2    | 3.5±0.2    | 4.9±0.3    | <b>1.2E-05</b> | <b>2.2E-04</b> | NA             |
| IL-1β (ng/ml)              | 2.5±0.6    | 4.2±1.2    | 6.6±1.4    | 5.3±1.3    | <b>0.008</b>   | <b>0.004</b>   | <b>0.006</b>   |
| CRP (ng/ml)                | 1.5±0.2    | 1.7±0.2    | 1.5±0.2    | 2.7±0.4    | <b>1.1E-04</b> | NA             | <b>0.002</b>   |
| SAA (ug/ml)                | 19.2±1.7   | 24.9±2.7   | 31.9±8.3   | 37.3±11.3  | 0.12           | 0.40           | 0.22           |

doi:10.1371/journal.pone.0066277.t003

for the circulating MMP-9 during a bacterial inflammatory challenge in humans [43] but evidence for neutrophils as a source of MMP-9 in non-infectious conditions is lacking. In the present study, we have first demonstrated a positive correlation of MMP-9 with WBC count in both men and women (Tables 2–5, and Fig. 1), which is independent of other inflammatory cytokines (e.g., CRP, MMP-1, SAA and IL-1β), demonstrating a positive association in an apparently healthy population. Then, we stratified men depending on smoking status, a known condition of non-bacterial, subclinical inflammation, and found that both MMP-9 and WBC levels were elevated in current smokers and reduced in former smokers. Thus, current smoking status is associated with elevated MMP-9 levels. Meanwhile, the correlation between WBCs and MMP-9 levels was stronger in smokers than in non-smokers. Although cause and effect cannot be determined from cross-sectional studies, it is logical to reason that the WBC count increase is a likely cause of MMP-9 elevation, because MMP-9 is

derived from WBCs, but not *vice versa*. Thus, the stronger relationship suggests that WBC count accounts for a larger proportion of the variation in MMP-9 levels in smokers than in non-smokers, or possibly that WBCs secrete more MMP-9 under an ongoing smoking condition.

Our finding of the previously unrecognized *in vivo* relationship of MMP-9 levels with WBC count has the following biological and clinical implications: 1) In non-smoking relatively healthy subjects, MMP-9 may be spontaneously released from WBC, which accounts for up to 7 and 19% MMP-9 variation in men and women, respectively (Fig. 2 and Fig. 3); 2) Under a non-infectious inflammatory state such as smoking, WBCs can account up for 21% of MMP-9 variation and may release more MMP-9, as suggested by the stronger correlation in smokers vs non-smokers. Elevation of both circulating MMP-9 and WBC count have been considered risk factors or biomarkers for cardiovascular disease [10],[11],[12],[13],[14],[15],[16],[51],[52],[53], COPD

**Table 4.** Association of WBC Quartiles with Selected Clinical Characteristics in Men.

|                           | Quartile 1 | Quartile 2 | Quartile 3 | Quartile 4 |                | P for trend    | P for trend    |
|---------------------------|------------|------------|------------|------------|----------------|----------------|----------------|
|                           | WBC:       | WBC:       | WBC:       | WBC:       | P for trend    | Adjusted for   | Adjusted for   |
|                           | 3.0–4.5    | 4.6–5.1    | 5.2–5.9    | 6.0–11.3   | Adjusted for   | age, BMI, &    | age, BMI, &    |
|                           | (n = 93)   | (n = 85)   | (n = 104)  | (n = 101)  | age, BMI       | CRP            | RBC            |
| AGE (years)               | 39.9±1.4   | 40.6±1.4   | 39.6±1.2   | 45.8±1.4   | NA             | NA             | NA             |
| BMI (kg/m <sup>2</sup> )  | 24.8±0.3   | 25.3±0.3   | 25.6±0.3   | 26.3±0.3   | NA             | NA             | NA             |
| SBP (mm Hg)               | 120±1      | 121±1      | 121±1      | 122±1      | 0.13           | 0.18           | 0.21           |
| DBP (mm Hg)               | 77±1       | 77±1       | 79±1       | 78±1       | 0.50           | 0.42           | 0.19           |
| RBC(10 <sup>12</sup> /L)* | 4.70±0.03  | 4.72±0.03  | 4.86±0.03  | 4.82±0.03  | <b>1.0E-05</b> | <b>5.7E-06</b> | NA             |
| MMP-1 (ng/ml)             | 3.1±0.2    | 3.6±0.3    | 3.5±0.2    | 4.1±0.3    | 0.09           | 0.24           | 0.07           |
| MMP-9 (ng/ml)             | 418±24     | 475±23     | 597±33     | 735±41     | <b>1.1E-09</b> | <b>6.6E-09</b> | <b>1.2E-08</b> |
| IL-1β (ng/ml)             | 5.0±1.2    | 5.5±1.4    | 4.0±0.8    | 2.2±0.5    | 0.41           | 0.42           | 0.47           |
| CRP (ng/ml)               | 1.4±0.3    | 1.4±0.3    | 2.1±0.8    | 3.4±0.8    | <b>7.5E-08</b> | NA             | <b>3.9E-08</b> |
| SAA (μg/ml)               | 10.6±1.7   | 12.5±1.8   | 11.9±2.0   | 16.8±2.4   | <b>0.02</b>    | 0.35           | <b>0.006</b>   |

doi:10.1371/journal.pone.0066277.t004

**Table 5.** Association of WBC Quartiles with Selected Clinical Characteristics in Women.

|                           | Quartile 1 | Quartile 2 | Quartile 3 | Quartile 4 |                | P for trend    | P for trend    |
|---------------------------|------------|------------|------------|------------|----------------|----------------|----------------|
|                           | WBC:       | WBC:       | WBC:       | WBC:       | P for trend    | Adjusted for   | Adjusted for   |
|                           | 2.6–4.3    | 4.4–5.0    | 5.1–5.8    | 5.9–9.1    | Adjusted for   | age, BMI, &    | age, BMI, &    |
|                           | (n=78)     | (n=85)     | (n=101)    | (n=91)     | age, BMI       | CRP            | MMP-1          |
| AGE (years)               | 47.0±1.7   | 45.8±1.5   | 43.9±1.3   | 44.1±1.4   | NA             | NA             | NA             |
| BMI (kg/m <sup>2</sup> )  | 26.6±0.6   | 26.6±0.5   | 28.1±0.5   | 29.2±0.6   | NA             | NA             | NA             |
| SBP (mm Hg)               | 123±2      | 122±2      | 119±2      | 121±2      | 0.84           | 0.96           | 0.67           |
| DBP (mm Hg)               | 77±1       | 77±1       | 75±1       | 75±1       | 0.08           | 0.14           | 0.10           |
| RBC(10 <sup>12</sup> /L)* | 4.22±0.03  | 4.19±0.03  | 4.30±0.03  | 4.32±0.03  | 0.07           | <b>0.05</b>    | <b>0.02</b>    |
| MMP-1 (ng/ml)             | 3.3±0.2    | 4.1±0.3    | 3.5±0.2    | 4.8±0.3    | <b>1.8E-04</b> | <b>0.005</b>   | NA             |
| MMP-9 (ng/ml)             | 380±29     | 419±22     | 475±28     | 758±46     | <b>1.1E-14</b> | <b>3.1E-12</b> | <b>9.7E-13</b> |
| IL-1β (ng/ml)             | 3.7±1.1    | 4.9±1.2    | 4.8±1.2    | 5.0±1.3    | 0.81           | 0.98           | 0.84           |
| CRP (ng/ml)               | 1.2±0.1    | 1.5±0.2    | 1.6±0.2    | 3.1±0.4    | <b>9.0E-08</b> | NA             | <b>2.3E-06</b> |
| SAA (μg/ml)               | 21.3±2.6   | 32.5±6.3   | 19.1±2.7   | 30.8±6.5   | 0.09           | 0.89           | 0.18           |

doi:10.1371/journal.pone.0066277.t005

[17],[18],[19], arthritis [20],[21],[22] and metabolic syndrome [23],[24], all of which are associated with subclinical inflammation and are promoted by smoking. The close relationship of MMP-9

with WBC count in smoking status provides an explanation for the overlap of these two biomarkers for those diseases; 3) As MMP-9 is an emerging biomarker for many inflammation-related diseases,

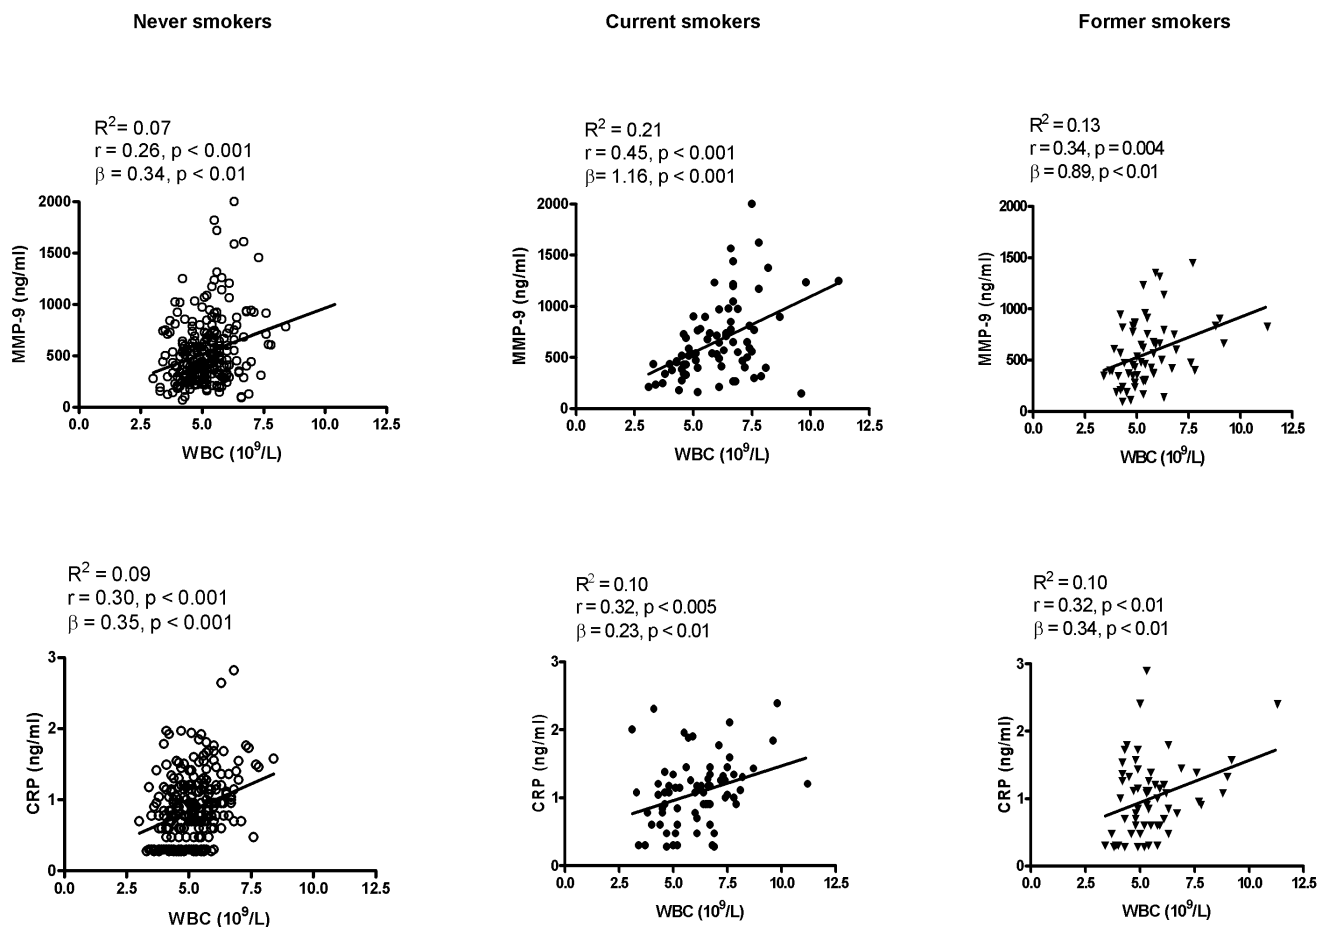**Figure 3. Correlations of MMP-9 and CRP with WBC.** Linear regression analysis of the correlation of WBC with MMP-9 (upper panel) and CRP (lower panel) in never (n=243), current (n=76) and former smokers (n=64).

doi:10.1371/journal.pone.0066277.g003

caution should be exercised that WBC count can be a confounding factor.

Nevertheless, the functional consequence of MMP-9 elevation during smoking requires further study. MMP-9 activity is suppressed by the endogenous tissue inhibitors of metalloproteinase 1 (TIMP1) [54],[55] and is a result of the balance between MMP-9 and TIMP-1 [56],[57]. As we did not measure TIMP-1 concentration or MMP-9 activity in the study, whether the elevated MMP-9 during smoking leads to increased MMP-9 activity is not known but deserves further study. It is also important to note that our finding of MMP-9 and WBC relationship is observational. Subsequent clinical study to fractionate blood cells and isolate neutrophils from smokers and none smokers is required to provide a mechanistic explanation for the relationship.

## References

- Back M, Ketelhuth DF, Agewall S (2010) Matrix metalloproteinases in atherothrombosis. *Prog Cardiovasc Dis* 52: 410–428.
- Lagente V, Boichot E (2010) Role of matrix metalloproteinases in the inflammatory process of respiratory diseases. *J Mol Cell Cardiol* 48: 440–444.
- Busti C, Falcinelli E, Momi S, Gresele P (2010) Matrix metalloproteinases and peripheral arterial disease. *Intern Emerg Med* 5: 13–25.
- Rydlova M, Holubec L, Jr., Ludvikova M, Jr., Kalfert D, Franekova J, et al. (2008) Biological activity and clinical implications of the matrix metalloproteinases. *Anticancer Res* 28: 1389–1397.
- Jacob MP (2003) Extracellular matrix remodeling and matrix metalloproteinases in the vascular wall during aging and in pathological conditions. *Biomed Pharmacother* 57: 195–202.
- Arunachalam G, Sundar IK, Hwang JW, Yao H, Rahman I (2010) Emphysema is associated with increased inflammation in lungs of atherosclerosis-prone mice by cigarette smoke: implications in comorbidities of COPD. *J Inflamm (Lond)* 7: 34.
- Overbeek SA, Braber S, Koelink PJ, Henricks PAJ, Mortaz E, et al. (2013) Cigarette Smoke-Induced Collagen Destruction; Key to Chronic Neutrophilic Airway Inflammation? *PLoS One* 8: e55612.
- Bauvois B (2012) New facets of matrix metalloproteinases MMP-2 and MMP-9 as cell surface transducers: outside-in signaling and relationship to tumor progression. *Biochim Biophys Acta* 1825: 29–36.
- Yang P, Yuan W, He J, Wang J, Yu L, et al. (2009) Overexpression of EphA2, MMP-9, and MVD-CD34 in hepatocellular carcinoma: Implications for tumor progression and prognosis. *Hepatol Res* 39: 1169–1177.
- Kato R, Momiyama Y, Ohmori R, Taniguchi H, Nakamura H, et al. (2005) Levels of matrix metalloproteinase-1 in patients with and without coronary artery disease and relation to complex and noncomplex coronary plaques. *Am J Cardiol* 95: 90–92.
- Hwang JJ, Yang WS, Chiang FT, Chen MF, Lin HJ, et al. (2009) Association of circulating matrix metalloproteinase-1, but not adiponectin, with advanced coronary artery disease. *Atherosclerosis* 204: 293–297.
- Muzzio ML, Miksztowicz V, Brites F, Aguilar D, Repetto EM, et al. (2009) Metalloproteinases 2 and 9, Lp-PLA(2) and lipoprotein profile in coronary patients. *Arch Med Res* 40: 48–53.
- Welsh P, Whincup PH, Papacosta O, Wannamethee SG, Lennon L, et al. (2008) Serum matrix metalloproteinase-9 and coronary heart disease: a prospective study in middle-aged men. *QJM* 101: 785–791.
- Dogan A, Tuzun N, Turker Y, Akcay S, Kaya S, et al. (2008) Matrix metalloproteinases and inflammatory markers in coronary artery ectasia: their relationship to severity of coronary artery ectasia. *Coron Artery Dis* 19: 559–563.
- Zysset T, Polokoff MA, Simon FR (1985) Effect of chronic ethanol administration on enzyme and lipid properties of liver plasma membranes in long and short sleep mice. *Hepatology* 5: 531–537.
- Wu YW, Yang WS, Chen MF, Lee BC, Hung CS, et al. (2008) High serum level of matrix metalloproteinase-1 and its rapid surge after intervention in patients with significant carotid atherosclerosis. *J Formos Med Assoc* 107: 93–98.
- Omachi TA, Eisner MD, Rames A, Markovtsova L, Blanc PD (2011) Matrix metalloproteinase-9 predicts pulmonary status declines in alpha-1-antitrypsin deficiency. *Respir Res* 12: 35.
- Bolton CE, Stone MD, Edwards PH, Duckers JM, Evans WD, et al. (2009) Circulating matrix metalloproteinase-9 and osteoporosis in patients with chronic obstructive pulmonary disease. *Chron Respir Dis* 6: 81–87.
- Brajer B, Batura-Gabryel H, Nowicka A, Kuznar-Kaminska B, Szczepanik A (2008) Concentration of matrix metalloproteinase-9 in serum of patients with chronic obstructive pulmonary disease and a degree of airway obstruction and disease progression. *J Physiol Pharmacol* 59 Suppl 6: 145–152.
- Koolwijk P, Miltenburg AM, van Erck MG, Oudshoorn M, Niedbala MJ, et al. (1995) Activated gelatinase-B (MMP-9) and urokinase-type plasminogen activator in synovial fluids of patients with arthritis. Correlation with clinical and experimental variables of inflammation. *J Rheumatol* 22: 385–393.
- Gruber BL, Sorbi D, French DL, Marchese MJ, Nuovo GJ, et al. (1996) Markedly elevated serum MMP-9 (gelatinase B) levels in rheumatoid arthritis: a potentially useful laboratory marker. *Clin Immunol Immunopathol* 78: 161–171.
- Giannelli G, Enriquez R, Iannone F, Marinosci F, Lapadula G, et al. (2004) MMP-2, MMP-9, TIMP-1 and TIMP-2 levels in patients with rheumatoid arthritis and psoriatic arthritis. *Clin Exp Rheumatol* 22: 335–338.
- Goncalves FM, Jacob-Ferreira AL, Gomes VA, Casella-Filho A, Chagas AC, et al. (2009) Increased circulating levels of matrix metalloproteinase (MMP)-8, MMP-9, and pro-inflammatory markers in patients with metabolic syndrome. *Clin Chim Acta* 403: 173–177.
- Roberts CK, Won D, Pruthi S, Kurtovic S, Sindhu RK, et al. (2006) Effect of a short-term diet and exercise intervention on oxidative stress, inflammation, MMP-9, and monocyte chemotactic activity in men with metabolic syndrome factors. *J Appl Physiol* 100: 1657–1665.
- Ramos-Fernandez M, Bellolio MF, Stead LG (2011) Matrix metalloproteinase-9 as a marker for acute ischemic stroke: a systematic review. *J Stroke Cerebrovasc Dis* 20: 47–54.
- Takagi H, Manabe H, Kawai N, Goto SN, Umemoto T (2009) Circulating matrix metalloproteinase-9 concentrations and abdominal aortic aneurysm presence: a meta-analysis. *Interact Cardiovasc Thorac Surg* 9: 437–440.
- Lim HS, Lip GY (2008) Circulating matrix metalloproteinase-9 levels in atherosclerotic vascular disease: a possible measurement of systemic or specific disease pathophysiology? *J Intern Med* 263: 620–622.
- Muroski ME, Roycik MD, Newcomer RG, Van den Steen PE, Opendakker G, et al. (2008) Matrix metalloproteinase-9/gelatinase B is a putative therapeutic target of chronic obstructive pulmonary disease and multiple sclerosis. *Curr Pharm Biotechnol* 9: 34–46.
- Grodin JL, Powell-Wiley TM, Ayers CR, Kumar DS, Rohatgi A, et al. (2011) Circulating levels of matrix metalloproteinase-9 and abdominal aortic pathology: from the Dallas Heart Study. *Vasc Med* 16: 339–345.
- Sands MF (2012) Localization of matrix metalloproteinase (MMP)-9 in lung tissue of a murine model of allergic asthma. *Immunol Invest* 41: 87–96.
- Jouneau S, Khorasani N, P DES, Maccdo P, Zhu J, et al. (2011) EMMPRIN (CD147) regulation of MMP-9 in bronchial epithelial cells in COPD. *Respirology* 16: 705–712.
- Battle M, Perez-Villa F, Garcia-Pras E, Lazaro A, Orus J, et al. (2007) Down-regulation of matrix metalloproteinase-9 (MMP-9) expression in the myocardium of congestive heart failure patients. *Transplant Proc* 39: 2344–2346.
- Li YY, Feng YQ, Kadokami T, McTiernan CF, Draviam R, et al. (2000) Myocardial extracellular matrix remodeling in transgenic mice overexpressing tumor necrosis factor alpha can be modulated by anti-tumor necrosis factor alpha therapy. *Proc Natl Acad Sci U S A* 97: 12746–12751.
- Dziembowska M, Wlodarczyk J (2012) MMP9: a novel function in synaptic plasticity. *Int J Biochem Cell Biol* 44: 709–713.
- Bar-Or A, Nuttall RK, Duddy M, Alter A, Kim HJ, et al. (2003) Analyses of all matrix metalloproteinase members in leukocytes emphasize monocytes as major inflammatory mediators in multiple sclerosis. *Brain* 126: 2738–2749.
- Fang L, Du XJ, Gao XM, Dart AM (2010) Activation of peripheral blood mononuclear cells and extracellular matrix and inflammatory gene profile in acute myocardial infarction. *Clin Sci (Lond)* 119: 175–183.
- Genersch E, Hayess K, Neuenfeld Y, Haller H (2000) Sustained ERK phosphorylation is necessary but not sufficient for MMP-9 regulation in endothelial cells: involvement of Ras-dependent and -independent pathways. *J Cell Sci* 113 Pt 23: 4319–4330.
- Roomi MW, Monterrey JC, Kalinovsky T, Rath M, Niedzwiecki A (2009) Patterns of MMP-2 and MMP-9 expression in human cancer cell lines. *Oncol Rep* 21: 1323–1333.
- Chambaut-Guerin AM, Herigault S, Rouet-Benzineb P, Rouher C, Lafuma C (2000) Induction of matrix metalloproteinase MMP-9 (92-kDa gelatinase) by retinoic acid in human neuroblastoma SKNB cells: relevance to neuronal differentiation. *J Neurochem* 74: 508–517.

40. Li X, Zhao X, Ma S (1999) Secretion of 92 kDa gelatinase (MMP-9) by bovine neutrophils. *Vet Immunol Immunopathol* 67: 247–258.
41. Kim KC, Lee CH (2005) MAP kinase activation is required for the MMP-9 induction by TNF-stimulation. *Arch Pharm Res* 28: 1257–1262.
42. Emens I, Rouy D, Velot E, Devaux Y, Wagner DR (2006) Adenosine inhibits matrix metalloproteinase-9 secretion by neutrophils: implication of A2a receptor and cAMP/PKA/Ca2+ pathway. *Circ Res* 99: 590–597.
43. Pugin J, Widmer MC, Kossodo S, Liang CM, Preas HLn, et al. (1999) Human neutrophils secrete gelatinase B in vitro and in vivo in response to endotoxin and proinflammatory mediators. *Am J Respir Cell Mol Biol* 20: 458–464.
44. Jonsson S, Lundberg A, Kalvegren H, Bergstrom I, Szymanowski A, et al. (2011) Increased levels of leukocyte-derived MMP-9 in patients with stable angina pectoris. *PLoS One* 6: e19340.
45. Agusti A, Edwards LD, Rennard SI, MacNee W, Tal-Singer R, et al. (2012) Persistent systemic inflammation is associated with poor clinical outcomes in COPD: a novel phenotype. *PLoS One* 7: e37483.
46. Velthove KJ, Bracke M, Souverein PC, Schweizer RC, Ten Berg MJ, et al. (2009) Identification of exacerbations in obstructive lung disease through biomarkers. *Biomarkers* 14: 523–528.
47. Odagiri K, Uehara A, Mizuta I, Yamamoto M, Kurata C (2011) Longitudinal study on white blood cell count and the incidence of metabolic syndrome. *Intern Med* 50: 2491–2498.
48. Oda E, Kawai R (2009) The prevalence of metabolic syndrome and diabetes increases through the quartiles of white blood cell count in Japanese men and women. *Intern Med* 48: 1127–1134.
49. Mitchell BD, McArdle PF, Shen H, Rampersaud E, Pollin TI, et al. (2008) The genetic response to short-term interventions affecting cardiovascular function: rationale and design of the Heredity and Phenotype Intervention (HAPI) Heart Study. *Am Heart J* 155: 823–828.
50. Shuldiner AR, O'Connell JR, Bliden KP, Gandhi A, Ryan K, et al. (2009) Association of cytochrome P450 2C19 genotype with the antiplatelet effect and clinical efficacy of clopidogrel therapy. *Jama* 302: 849–857.
51. Hansson J, Lind L, Hulthe J, Sundstrom J (2009) Relations of serum MMP-9 and TIMP-1 levels to left ventricular measures and cardiovascular risk factors: a population-based study. *Eur J Cardiovasc Prev Rehabil* 16: 297–303.
52. Sundstrom J, Evans JC, Benjamin EJ, Levy D, Larson MG, et al. (2004) Relations of plasma matrix metalloproteinase-9 to clinical cardiovascular risk factors and echocardiographic left ventricular measures: the Framingham Heart Study. *Circulation* 109: 2850–2856.
53. Garvin P, Nilsson L, Carstensen J, Jonasson L, Kristenson M (2008) Circulating matrix metalloproteinase-9 is associated with cardiovascular risk factors in a middle-aged normal population. *PLoS One* 3: e1774.
54. Vu TH, Werb Z (2000) Matrix metalloproteinases: effectors of development and normal physiology. *Genes Dev* 14: 2123–2133.
55. Brew K, Dinakarpandian D, Nagase H (2000) Tissue inhibitors of metalloproteinases: evolution, structure and function. *Biochim Biophys Acta* 1477: 267–283.
56. Avolio C, Ruggieri M, Giuliani F, Liuzzi GM, Leante R, et al. (2003) Serum MMP-2 and MMP-9 are elevated in different multiple sclerosis subtypes. *J Neuroimmunol* 136: 46–53.
57. Hansson J, Vasan RS, Arnlöv J, Ingelsson E, Lind L, et al. (2011) Biomarkers of Extracellular Matrix Metabolism (MMP-9 and TIMP-1) and Risk of Stroke, Myocardial Infarction, and Cause-Specific Mortality: Cohort Study. *PLoS One* 6: e16185.
